# Supplementary material
Source: publisher site journal article supplement (https://www.dovepress.com/article/558033)
Supplement: Supplementary file 1 [file 558033_Supplementary_Table_S1%20%252525281%25252529.docx]

Supplementary Table S1. Tumor purity estimates for sequenced samples

| Sample ID | Patient ID | Sample Type | Estimated Tumor Purity (%) |
| --- | --- | --- | --- |
| P1 | 1 | Primary | 40 |
| P2 | 2 | Primary | 60 |
| P3 | 3 | Primary | 55 |
| P4 | 4 | Primary | 50 |
| P5 | 5 | Primary | 70 |
| P6 | 6 | Primary | 60 |
| P7 | 7 | Primary | 50 |
| P8 | 8 | Primary | 55 |
| P9 | 9 | Primary | 60 |
| P10 | 10 | Primary | 50 |
| P11 | 11 | Primary | 60 |
| P12 | 12 | Primary | 55 |
| P13 | 13 | Primary | 50 |
| P14 | 14 | Primary | 70 |
| P15 | 15 | Primary | 70 |
| P16 | 16 | Primary | 65 |
| LN1 | 4 | LN Metastasis | 40 |
| LN2 | 8 | LN Metastasis | 35 |
| LN3 | 9 | LN Metastasis | 30 |
| LN4 | 10 | LN Metastasis | 45 |
| LN5 | 13 | LN Metastasis | 35 |
| LN6 | 14 | LN Metastasis | 30 |
| LN7 | 15 | LN Metastasis | 40 |
| LN8 | 16 | LN Metastasis | 50 |
| DM1 | 10 | Distant Metastasis | 30 |

Note: This table includes only the 25 samples from which high-quality DNA was successfully extracted and sequenced. One primary tumor sample (Case 17, fibromatosis-like metaplastic carcinoma) had insufficient material for DNA extraction and is therefore not listed.
